# Supplementary material for: mRNA Vaccine-Elicited Severe Acute Respiratory Syndrome Coronavirus 2 (SARS-CoV-2)–Specific T Cells Persist at 6 Months and Recognize the Delta Variant
Source: Oxford University Press journal article supplement (doi:10.1093/cid/ciab915), 2021-10-22
Supplement: ciab915_suppl_supplementary_table_1.docx [file ciab915_suppl_supplementary_table_1.docx]

Supplementary Table 1: Age of study participants

| Age (years) | Number of participants |
| --- | --- |
| 21-30 | 4 |
| 31-40 | 3 |
| 41-50 | 4 |
| 51-60 | 4 |
