# Supplementary material for: mRNA Vaccine-Elicited Severe Acute Respiratory Syndrome Coronavirus 2 (SARS-CoV-2)–Specific T Cells Persist at 6 Months and Recognize the Delta Variant
Source: Oxford University Press journal article supplement (doi:10.1093/cid/ciab915), 2021-10-22
Supplement: ciab915_suppl_supplementary_table_2_3_10-12-21.docx [file ciab915_suppl_supplementary_table_2_3_10-12-21.docx]

Supplemental Table 2: Spot forming units per million PBMCs in vaccinated individuals 7-14 days or 6 months post vaccination.

|  | SFU/million PBMCs | | | |
| --- | --- | --- | --- | --- |
|  | 7-14 days | | 6 months | |
|  | Media | Spike | Media | Spike |
| VR1 | 39 | 1088 | 27 | 331 |
| VR2 | 13 | 1048 | 1 | 247 |
| VR8 | 1 | 433 | 3 | 300 |
| VR10 | 7 | 237 | 16 | 64 |
| VR17 | 12 | 263 | 52 | 209 |
| VR19 | 3 | 223 | 1 | 60 |
| VR24 | 1 | 247 | 3 | 39 |
| VR25 | 1 | 129 | 11 | 123 |
| VR26 | 4 | 53 | 8 | 75 |
| VR27 | 0 | 95 | 3 | 87 |
| VR28 | 0 | 383 | 9 | 224 |
| VR29 | 0 | 159 | 0 | 309 |
| VR31 | 0 | 41 | 13 | 103 |
| VR35 | 1 | 21 | 25 | 79 |
| VR36 | 23 | 289 | 87 | 140 |

Supplemental Table 3: Spot forming units per million CD8 depleted PBMCs in vaccinated individuals 7-14 days or 6 months post vaccination.

|  | SFU/million CD8 depleted PBMCs | | | |
| --- | --- | --- | --- | --- |
|  | 7-14 days | | 6 months | |
|  | Media | Spike | Media | Spike |
| VR1 | 64 | 1132 | 93 | 510 |
| VR2 | 12 | 1097 | 0 | 232 |
| VR8 | 1 | 559 | 3 | 480 |
| VR10 | 7 | 205 | 32 | 118 |
| VR17 | 23 | 341 | 55 | 204 |
| VR19 | 9 | 312 | 11 | 64 |
| VR24 | 0 | 277 | 57 | 85 |
| VR25 | 3 | 244 | 9 | 168 |
| VR26 | 1 | 115 | 37 | 125 |
| VR27 | 3 | 195 | 16 | 168 |
| VR28 | 3 | 368 | 11 | 226 |
| VR29 | 7 | 199 | 1 | 326 |
| VR31 | 1 | 65 | 9 | 96 |
| VR35 | 0 | 5 | 15 | 105 |
